# Supplementary material for: Assignment of Absolute Configuration of a New Hepatoprotective Schiartane-Type Nortriterpenoid Using X-ray Diffraction
Source: PubMed Central journal article supplement (PMC6155901; doi:10.3390/molecules22010065), 2017-01-02
Supplement: molecules-22-00065-s001.pdf [file molecules-22-00065-s001.pdf]

# Supplementary Materials: Assignment of Absolute Configuration of a New Hepatoprotective Schiartane-Type Nortriterpenoid Using X-Ray Diffraction

Xiaojuan Wang, Frank R. Fronczek, Jiabao Chen, Jiabao Liu, Daneel Ferreira, Shuai Li and Mark T. Hamann

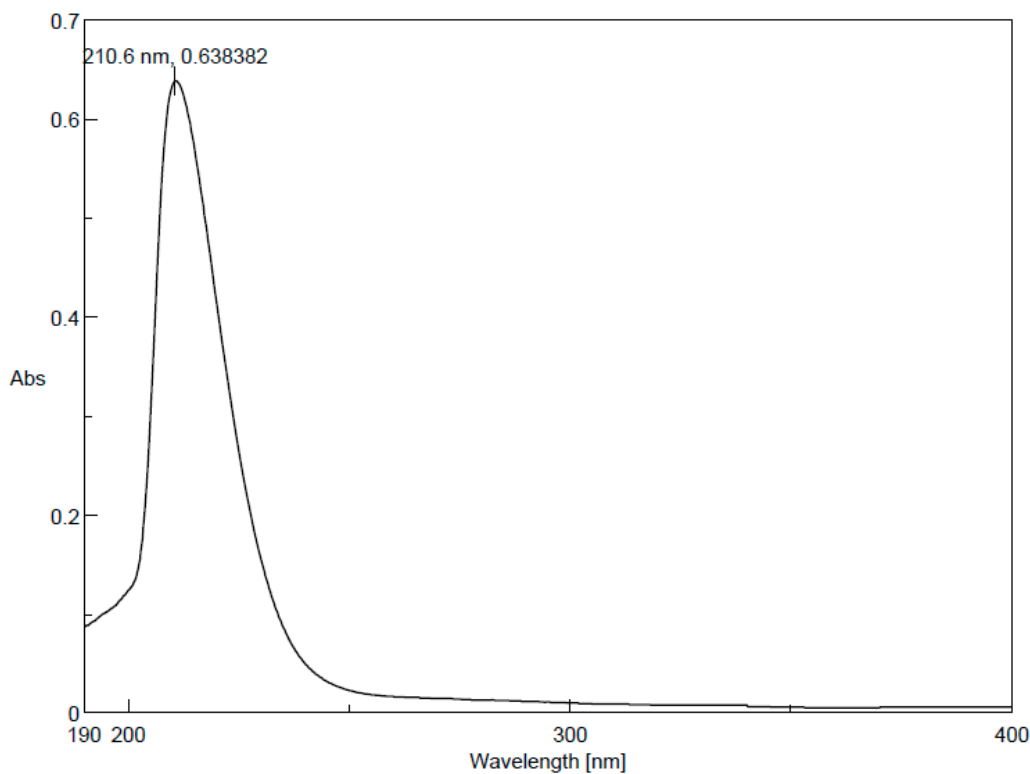

Figure S1. The UV spectrum of micrandilactone H.

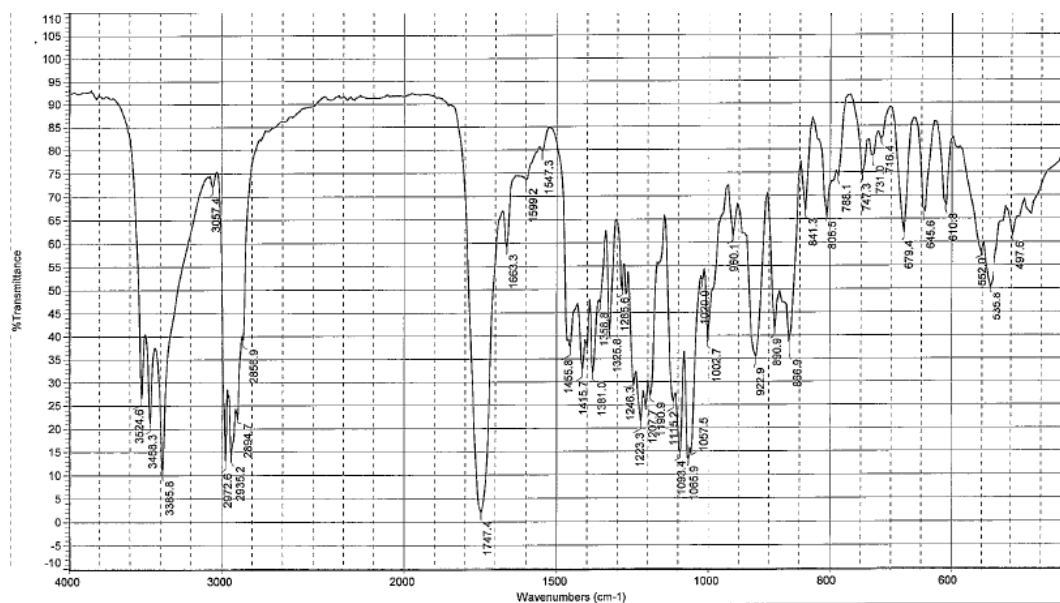

Figure S2. The IR spectrum of micrandilactone H.

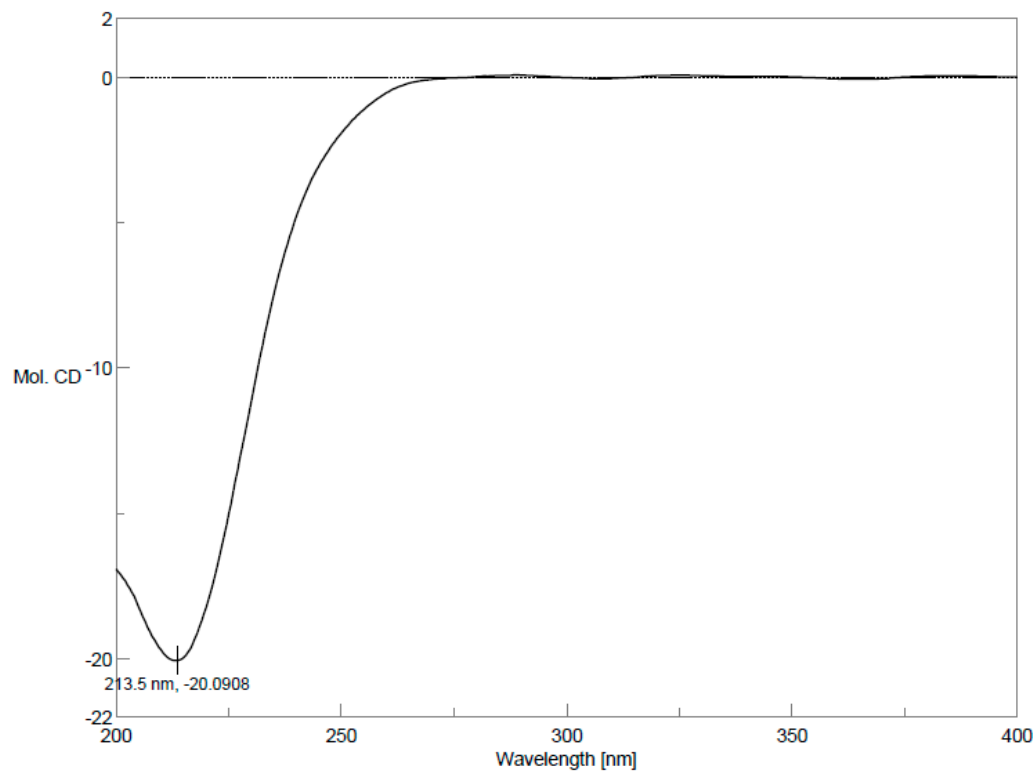

Figure S3. The ECD spectrum of micrandilactone H.

| m/z      | Ion                | Formula       | Abundance |             |          |           |          |            |                |            |             |               |     |
|----------|--------------------|---------------|-----------|-------------|----------|-----------|----------|------------|----------------|------------|-------------|---------------|-----|
| 517.2806 | (M+H) <sup>+</sup> | C29 H41 O8    | 199917.5  |             |          |           |          |            |                |            |             |               |     |
| Best     | Formula (M)        | Ion Formula   | Score     | Cross Score | Mass     | Calc Mass | Calc m/z | Diff (ppm) | Abs Diff (ppm) | Mass Match | Abund Match | Spacing Match | DBE |
| ✓        | C28 H40 O8         | C29 H41 O8    | 99.73     |             | 516.2794 | 516.2723  | 517.2796 | -2         | 2              | 99.89      | 99.95       | 99.92         | 10  |
| m/z      | Ion                | Formula       | Abundance |             |          |           |          |            |                |            |             |               |     |
| 539.2837 | (M+H) <sup>+</sup> | C29 H43 Na O8 | 876727.5  |             |          |           |          |            |                |            |             |               |     |
| Best     | Formula (M)        | Ion Formula   | Score     | Cross Score | Mass     | Calc Mass | Calc m/z | Diff (ppm) | Abs Diff (ppm) | Mass Match | Abund Match | Spacing Match | DBE |
| ✓        | C28 H40 O8         | C29 H43 Na O8 | 99.68     |             | 516.2744 | 516.2723  | 539.2616 | -4.1       | 4.1            | 99.47      | 99.89       | 99.91         | 10  |

Figure S4. The HR-ESI-MS spectrum of micrandilactone H.

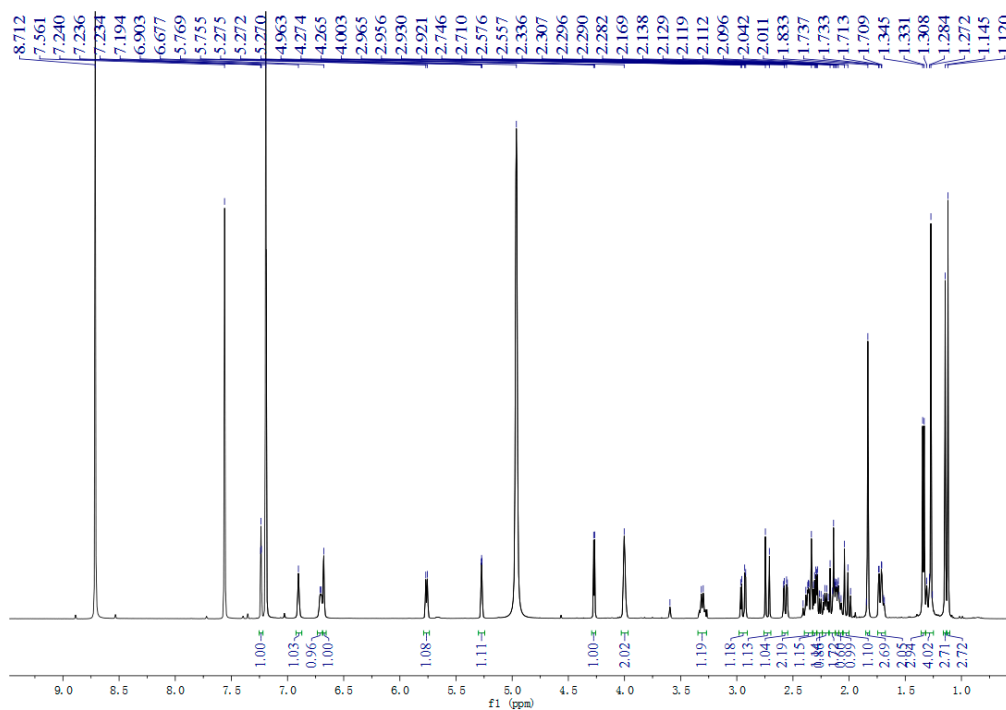Figure S5. The <sup>1</sup>H-NMR spectrum of micrandilactone H.

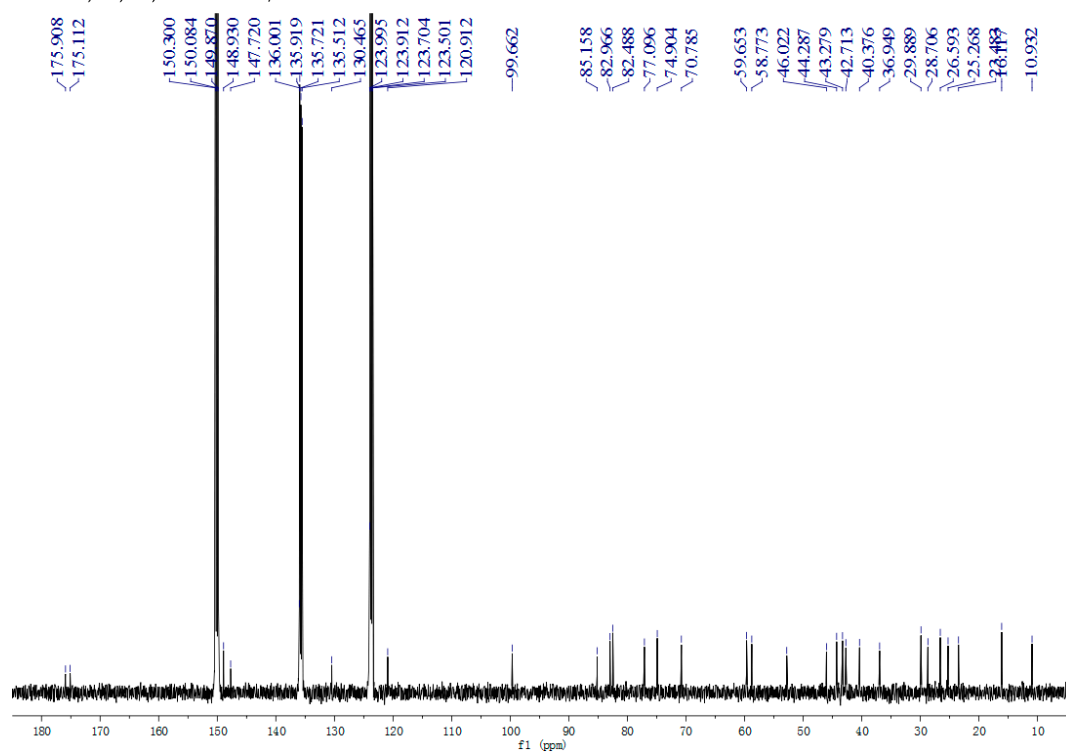Figure S6. The  $^{13}\text{C}$ -NMR spectrum of micrandilactone H.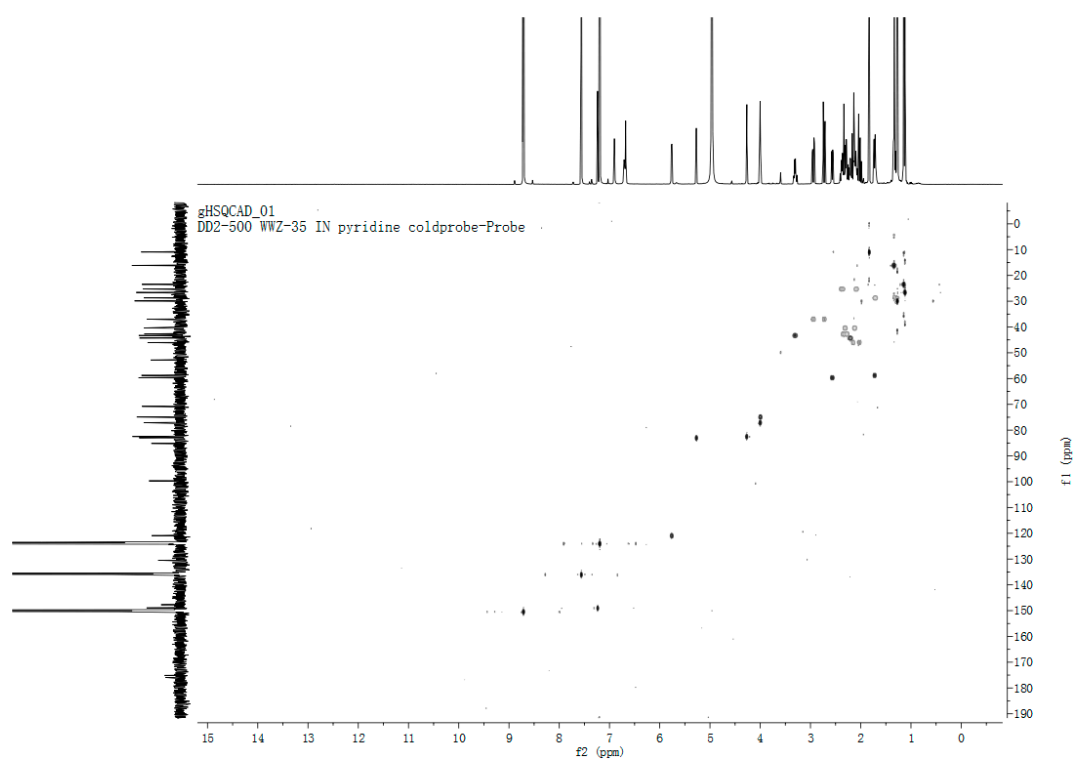

Figure S7. The HSQC spectrum of micrandilactone H.

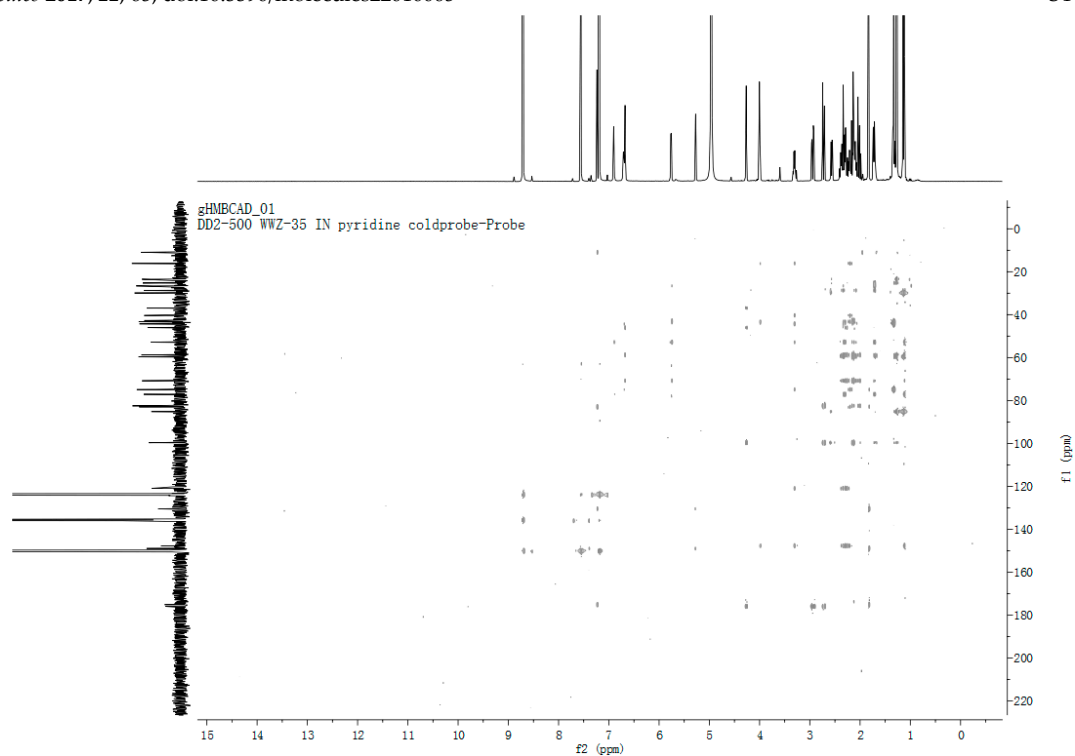

Figure S8. The HMBC spectrum of micrandilactone H.

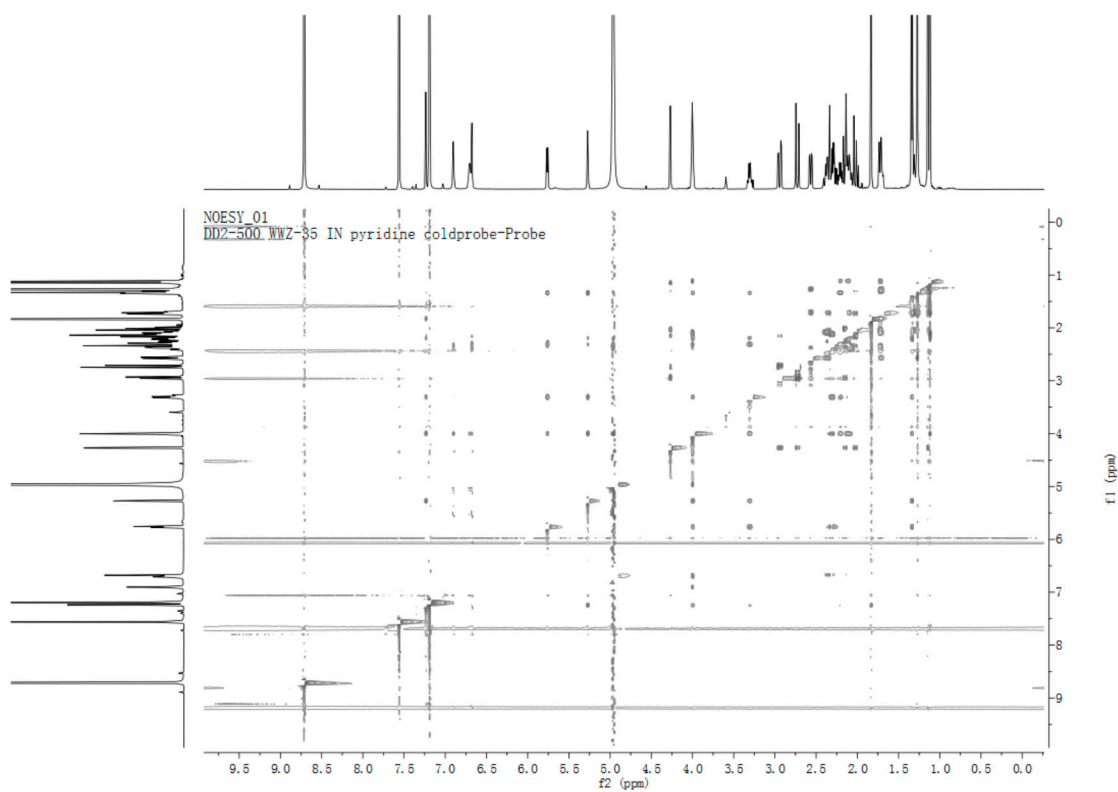

Figure S9. The NOESY spectrum of micrandilactone H.

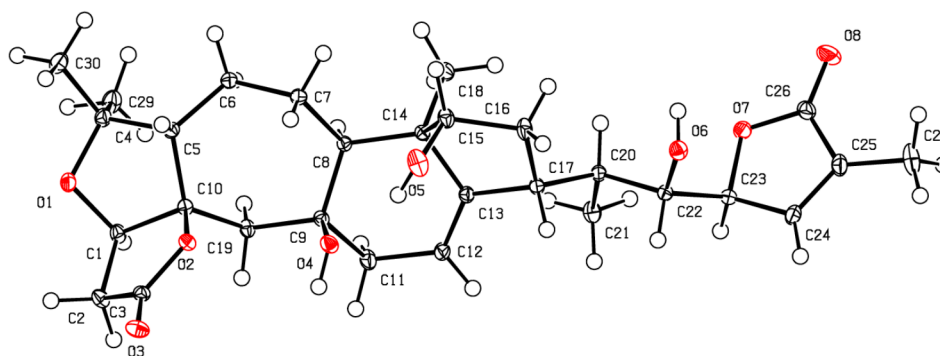

**Figure S10.** ORTEP plot of the molecular structure of micrandilactone H. Red = oxygen; grey = carbon; white = hydrogen.

**Table S1.** Crystal data and structure refinement for micrandilactone H.

| Identification Code                         | Micrandilactone H.                                                                                                                          |
|---------------------------------------------|---------------------------------------------------------------------------------------------------------------------------------------------|
| Empirical formula                           | C <sub>29</sub> H <sub>40</sub> O <sub>8</sub>                                                                                              |
| Formula weight                              | 516.61                                                                                                                                      |
| Temperature                                 | 90 K                                                                                                                                        |
| Wavelength                                  | 0.71073 Å                                                                                                                                   |
| Crystal system                              | Monoclinic                                                                                                                                  |
| Space group                                 | <i>P</i> 2 <sub>1</sub>                                                                                                                     |
| Unit cell dimensions                        | <i>a</i> = 10.8666 (16) Å, $\alpha$ = 90°<br><i>b</i> = 10.3174 (16) Å, $\beta$ = 113.828(7)°<br><i>c</i> = 12.6133 (19) Å, $\gamma$ = 90°. |
| Volume                                      | 1293.6 (3) Å <sup>3</sup>                                                                                                                   |
| <i>Z</i>                                    | 2                                                                                                                                           |
| Density (calculated)                        | 1.326 mg/m <sup>3</sup>                                                                                                                     |
| Absorption coefficient, $\mu$               | 0.10 mm <sup>-1</sup>                                                                                                                       |
| <i>F</i> (000)                              | 556.0                                                                                                                                       |
| Crystal size                                | 0.33 × 0.29 × 0.15 mm                                                                                                                       |
| Theta range for data collection             | 1.8° to 36.4°                                                                                                                               |
| Index ranges                                | -18 ≤ <i>h</i> ≤ 16, -17 ≤ <i>k</i> ≤ 13, -20 ≤ <i>l</i> ≤ 20                                                                               |
| Reflections collected                       | 21,401                                                                                                                                      |
| Independent reflections                     | 10,252                                                                                                                                      |
| Completeness to theta = 25.2°               | 0.999                                                                                                                                       |
| Absorption correction                       | Multi-scan                                                                                                                                  |
| Max. and min. transmission                  | 0.986 and 0.934                                                                                                                             |
| Refinement method                           | Full-matrix least-squares on <i>F</i> <sup>2</sup>                                                                                          |
| Data/restraints/parameters                  | 10252/1/348                                                                                                                                 |
| Goodness-of-fit on <i>F</i> <sup>2</sup>    | 1.04                                                                                                                                        |
| Final <i>R</i> [ <i>I</i> > 2σ( <i>I</i> )] | 0.036                                                                                                                                       |
| <i>R</i> (all data)                         | 0.041                                                                                                                                       |
| Absolute structure parameter                | 0.0(2)                                                                                                                                      |
| Extinction coefficient                      | none                                                                                                                                        |
| Largest diff. peak and hole                 | 0.40, -0.23 eÅ <sup>-3</sup>                                                                                                                |

**Table S2.** Fractional atomic coordinates and isotropic or equivalent isotropic displacement parameters ( $\text{\AA}^2$ ) for micrandilactone H.

|      | <i>x</i>     | <i>y</i>     | <i>z</i>     | $U_{\text{iso}}^*/U_{\text{eq}}$ |
|------|--------------|--------------|--------------|----------------------------------|
| O1   | 0.72536 (8)  | 0.52140 (10) | 0.44744 (7)  | 0.01375 (17)                     |
| O2   | 0.46412 (8)  | 0.63965 (8)  | 0.44877 (7)  | 0.00996 (15)                     |
| O3   | 0.34881 (9)  | 0.69061 (9)  | 0.26348 (8)  | 0.01523 (17)                     |
| O4   | 0.32344 (9)  | 0.60775 (10) | 0.58935 (8)  | 0.01314 (16)                     |
| H4O  | 0.2667 (19)  | 0.583 (2)    | 0.5228 (17)  | 0.020 *                          |
| O5   | 0.32670 (11) | 0.77748 (10) | 0.75508 (9)  | 0.01838 (19)                     |
| H5O  | 0.307 (2)    | 0.721 (2)    | 0.7022 (18)  | 0.028*                           |
| O6   | 0.11200 (9)  | 0.66578 (9)  | 1.04811 (8)  | 0.01346 (16)                     |
| H6O  | 0.1822 (19)  | 0.664 (2)    | 1.1052 (17)  | 0.020*                           |
| O7   | 0.14669 (8)  | 0.43545 (9)  | 1.18981 (7)  | 0.01370 (17)                     |
| O8   | 0.17721 (11) | 0.47960 (13) | 1.37233 (9)  | 0.0267 (2)                       |
| C1   | 0.59976 (11) | 0.46515 (12) | 0.43314 (10) | 0.0118 (2)                       |
| H1   | 0.6069       | 0.3695       | 0.4472       | 0.014*                           |
| C2   | 0.49446 (12) | 0.49921 (13) | 0.31467 (10) | 0.0130 (2)                       |
| H2A  | 0.5366       | 0.5176       | 0.2598       | 0.016*                           |
| H2B  | 0.4290       | 0.4277       | 0.2833       | 0.016*                           |
| C3   | 0.42705 (11) | 0.61851 (12) | 0.33498 (10) | 0.01077 (19)                     |
| C4   | 0.79711 (11) | 0.54304 (13) | 0.57031 (10) | 0.0128 (2)                       |
| C5   | 0.68697 (11) | 0.60346 (12) | 0.60447 (10) | 0.01039 (18)                     |
| H5A  | 0.6805       | 0.6973       | 0.5829       | 0.012*                           |
| C6   | 0.71704 (11) | 0.59738 (13) | 0.73337 (10) | 0.0129 (2)                       |
| H6A  | 0.7987       | 0.6494       | 0.7762       | 0.015*                           |
| H6B  | 0.7373       | 0.5064       | 0.7596       | 0.015 *                          |
| C7   | 0.60256 (11) | 0.64662 (13) | 0.76546 (10) | 0.0123 (2)                       |
| H7A  | 0.6423       | 0.6862       | 0.8436       | 0.015 *                          |
| H7B  | 0.5523       | 0.7152       | 0.7099       | 0.015 *                          |
| C8   | 0.50358 (11) | 0.53999 (11) | 0.76490 (9)  | 0.00924 (18)                     |
| H8   | 0.5609       | 0.4621       | 0.7986       | 0.011 *                          |
| C9   | 0.40725 (11) | 0.49866 (12) | 0.64283 (9)  | 0.00970 (18)                     |
| C10  | 0.55634 (10) | 0.53822 (11) | 0.52012 (9)  | 0.00915 (18)                     |
| C11  | 0.31924 (13) | 0.38596 (13) | 0.65300 (11) | 0.0154 (2)                       |
| H11A | 0.2524       | 0.3625       | 0.5748       | 0.018 *                          |
| H11B | 0.3767       | 0.3092       | 0.6860       | 0.018 *                          |
| C12  | 0.24725 (12) | 0.42141 (13) | 0.72826 (10) | 0.0136 (2)                       |
| H12  | 0.1620       | 0.3834       | 0.7126       | 0.016 *                          |
| C13  | 0.29837 (11) | 0.50405 (12) | 0.81600 (9)  | 0.01010 (18)                     |
| C14  | 0.43376 (11) | 0.56952 (12) | 0.84893 (9)  | 0.00931 (18)                     |
| C15  | 0.39495 (12) | 0.71139 (12) | 0.86178 (10) | 0.0126 (2)                       |
| H15  | 0.4768       | 0.7612       | 0.9117       | 0.015 *                          |
| C16  | 0.29873 (13) | 0.69653 (13) | 0.92437 (11) | 0.0139 (2)                       |
| H16A | 0.2343       | 0.7696       | 0.9045       | 0.017 *                          |
| H16B | 0.3504       | 0.6950       | 1.0094       | 0.017 *                          |
| C17  | 0.22296 (11) | 0.56646 (12) | 0.88195 (9)  | 0.01036 (19)                     |
| H17  | 0.1307       | 0.5882       | 0.8237       | 0.012 *                          |
| C18  | 0.53056 (12) | 0.52340 (14) | 0.97031 (10) | 0.0147 (2)                       |
| H18A | 0.4878       | 0.5348       | 1.0248       | 0.022 *                          |
| H18B | 0.6136       | 0.5745       | 0.9964       | 0.022 *                          |
| H18C | 0.5519       | 0.4316       | 0.9669       | 0.022 *                          |
| C19  | 0.48074 (11) | 0.44821 (11) | 0.56867 (10) | 0.01039 (18)                     |

Table S2. Cont.

|      | <i>x</i>      | <i>y</i>     | <i>z</i>     | <i>U</i> <sub>iso</sub> */ <i>U</i> <sub>eq</sub> |
|------|---------------|--------------|--------------|---------------------------------------------------|
| H19A | 0.5461        | 0.3822       | 0.6158       | 0.012 *                                           |
| H19B | 0.4129        | 0.4019       | 0.5018       | 0.012 *                                           |
| C20  | 0.20562 (11)  | 0.48329 (12) | 0.97848 (9)  | 0.01012 (18)                                      |
| H20  | 0.2892        | 0.4925       | 1.0510       | 0.012 *                                           |
| C21  | 0.18522 (13)  | 0.33929 (13) | 0.94771 (11) | 0.0144 (2)                                        |
| H21A | 0.1836        | 0.2905       | 1.0138       | 0.022 *                                           |
| H21B | 0.2592        | 0.3079       | 0.9290       | 0.022 *                                           |
| H21C | 0.0997        | 0.3271       | 0.8806       | 0.022 *                                           |
| C22  | 0.08720 (11)  | 0.53849 (12) | 1.00190 (9)  | 0.01094 (19)                                      |
| H22  | 0.0099        | 0.5456       | 0.9246       | 0.013 *                                           |
| C23  | 0.03925 (11)  | 0.45074 (13) | 1.07598 (10) | 0.01171 (19)                                      |
| H23  | 0.0130        | 0.3641       | 1.0380       | 0.014 *                                           |
| C24  | -0.07391 (12) | 0.50547 (14) | 1.10001 (11) | 0.0148 (2)                                        |
| H24  | -0.1599       | 0.5266       | 1.0421       | 0.018 *                                           |
| C25  | -0.03865 (13) | 0.52078 (14) | 1.21338 (11) | 0.0157 (2)                                        |
| C26  | 0.10340 (13)  | 0.47907 (14) | 1.27055 (10) | 0.0158 (2)                                        |
| C27  | -0.11622 (17) | 0.56715 (18) | 1.28035 (14) | 0.0271 (3)                                        |
| H27A | -0.2000       | 0.6079       | 1.2274       | 0.041 *                                           |
| H27B | -0.0623       | 0.6305       | 1.3384       | 0.041 *                                           |
| H27C | -0.1372       | 0.4935       | 1.3192       | 0.041 *                                           |
| C29  | 0.85235 (13)  | 0.41378 (14) | 0.63016 (12) | 0.0169 (2)                                        |
| H29A | 0.7777        | 0.3590       | 0.6279       | 0.025 *                                           |
| H29B | 0.9136        | 0.4297       | 0.7110       | 0.025 *                                           |
| H29C | 0.9012        | 0.3700       | 0.5900       | 0.025 *                                           |
| C30  | 0.91182 (12)  | 0.63674 (14) | 0.58623 (11) | 0.0168 (2)                                        |
| H30A | 0.9803        | 0.5926       | 0.5674       | 0.025 *                                           |
| H30B | 0.9520        | 0.6665       | 0.6669       | 0.025 *                                           |
| H30C | 0.8769        | 0.7114       | 0.5347       | 0.025 *                                           |

Table S3. Bond lengths (Å) and angles (°) for micrandilactone H.

|        |             |          |             |
|--------|-------------|----------|-------------|
| O1—C1  | 1.4259 (15) | C12—C13  | 1.3281 (17) |
| O1—C4  | 1.4433 (15) | C12—H12  | 0.9500      |
| O2—C3  | 1.3426 (14) | C13—C14  | 1.5164 (16) |
| O2—C10 | 1.4767 (14) | C13—C17  | 1.5261 (16) |
| O3—C3  | 1.2125 (15) | C14—C18  | 1.5414 (16) |
| O4—C9  | 1.4334 (15) | C14—C15  | 1.5498 (18) |
| O4—H4O | 0.85 (2)    | C15—C16  | 1.5514 (17) |
| O5—C15 | 1.4212 (16) | C15—H15  | 1.0000      |
| O5—H5O | 0.85 (2)    | C16—C17  | 1.5521 (18) |
| O6—C22 | 1.4178 (16) | C16—H16A | 0.9900      |
| O6—H6O | 0.81 (2)    | C16—H16B | 0.9900      |
| O7—C26 | 1.3595 (16) | C17—C20  | 1.5619 (16) |
| O7—C23 | 1.4474 (14) | C17—H17  | 1.0000      |
| O8—C26 | 1.2081 (15) | C18—H18A | 0.9800      |
| C1—C2  | 1.5114 (17) | C18—H18B | 0.9800      |
| C1—C10 | 1.5533 (16) | C18—H18C | 0.9800      |
| C1—H1  | 1.0000      | C19—H19A | 0.9900      |
| C2—C3  | 1.5062 (17) | C19—H19B | 0.9900      |
| C2—H2A | 0.9900      | C20—C21  | 1.5289 (19) |
| C2—H2B | 0.9900      | C20—C22  | 1.5410 (16) |
| C4—C30 | 1.5253 (19) | C20—H20  | 1.0000      |
| C4—C29 | 1.5305 (19) | C21—H21A | 0.9800      |

Table S3. Cont.

|            |             |               |             |
|------------|-------------|---------------|-------------|
| C4–C5      | 1.5567 (16) | C21–H21B      | 0.9800      |
| C5–C6      | 1.5247 (16) | C21–H21C      | 0.9800      |
| C5–C10     | 1.5427 (16) | C22–C23       | 1.5355 (16) |
| C5–H5A     | 1.0000      | C22–H22       | 1.0000      |
| C6–C7      | 1.5415 (17) | C23–C24       | 1.4912 (17) |
| C6–H6A     | 0.9900      | C23–H23       | 1.0000      |
| C6–H6B     | 0.9900      | C24–C25       | 1.3320 (18) |
| C7–C8      | 1.5367 (17) | C24–H24       | 0.9500      |
| C7–H7A     | 0.9900      | C25–C26       | 1.4794 (19) |
| C7–H7B     | 0.9900      | C25–C27       | 1.4927 (18) |
| C8–C9      | 1.5317 (15) | C27–H27A      | 0.9800      |
| C8–C14     | 1.5625 (15) | C27–H27B      | 0.9800      |
| C8–H8      | 1.0000      | C27–H27C      | 0.9800      |
| C9–C11     | 1.5435 (17) | C29–H29A      | 0.9800      |
| C9–C19     | 1.5451 (15) | C29–H29B      | 0.9800      |
| C10–C19    | 1.5228 (16) | C29–H29C      | 0.9800      |
| C11–C12    | 1.4989 (17) | C30–H30A      | 0.9800      |
| C11–H11A   | 0.9900      | C30–H30B      | 0.9800      |
| C11–H11B   | 0.9900      | C30–H30C      | 0.9800      |
| C1–O1–C4   | 105.84 (9)  | O5–C15–C14    | 114.46 (10) |
| C3–O2–C10  | 111.90 (9)  | O5–C15–C16    | 109.15 (10) |
| C9–O4–H4O  | 107.3 (15)  | C14–C15–C16   | 103.16 (10) |
| C15–O5–H5O | 106.4 (15)  | O5–C15–H15    | 109.9       |
| C22–O6–H6O | 107.0 (15)  | C14–C15–H15   | 109.9       |
| C26–O7–C23 | 108.81 (9)  | C16–C15–H15   | 109.9       |
| O1–C1–C2   | 109.52 (10) | C15–C16–C17   | 106.43 (9)  |
| O1–C1–C10  | 105.16 (9)  | C15–C16–H16A  | 110.4       |
| C2–C1–C10  | 105.12 (9)  | C17–C16–H16A  | 110.4       |
| O1–C1–H1   | 112.2       | C15–C16–H16B  | 110.4       |
| C2–C1–H1   | 112.2       | C17–C16–H16B  | 110.4       |
| C10–C1–H1  | 112.2       | H16A–C16–H16B | 108.6       |
| C3–C2–C1   | 104.35 (9)  | C13–C17–C16   | 103.05 (9)  |
| C3–C2–H2A  | 110.9       | C13–C17–C20   | 116.97 (10) |
| C1–C2–H2A  | 110.9       | C16–C17–C20   | 114.87 (9)  |
| C3–C2–H2B  | 110.9       | C13–C17–H17   | 107.1       |
| C1–C2–H2B  | 110.9       | C16–C17–H17   | 107.1       |
| H2A–C2–H2B | 108.9       | C20–C17–H17   | 107.1       |
| O3–C3–O2   | 120.86 (11) | C14–C18–H18A  | 109.5       |
| O3–C3–C2   | 128.16 (11) | C14–C18–H18B  | 109.5       |
| O2–C3–C2   | 110.98 (10) | H18A–C18–H18B | 109.5       |
| O1–C4–C30  | 107.32 (10) | C14–C18–H18C  | 109.5       |
| O1–C4–C29  | 109.20 (11) | H18A–C18–H18C | 109.5       |
| C30–C4–C29 | 110.52 (10) | H18B–C18–H18C | 109.5       |
| O1–C4–C5   | 102.53 (9)  | C10–C19–C9    | 122.19 (10) |
| C30–C4–C5  | 112.86 (11) | C10–C19–H19A  | 106.8       |
| C29–C4–C5  | 113.86 (10) | C9–C19–H19A   | 106.8       |
| C6–C5–C10  | 117.30 (9)  | C10–C19–H19B  | 106.8       |
| C6–C5–C4   | 114.91 (9)  | C9–C19–H19B   | 106.8       |
| C10–C5–C4  | 103.33 (9)  | H19A–C19–H19B | 106.6       |
| C6–C5–H5A  | 106.9       | C21–C20–C22   | 111.17 (10) |
| C10–C5–H5A | 106.9       | C21–C20–C17   | 112.76 (9)  |
| C4–C5–H5A  | 106.9       | C22–C20–C17   | 108.63 (9)  |
| C5–C6–C7   | 114.73 (10) | C21–C20–H20   | 108.0       |
| C5–C6–H6A  | 108.6       | C22–C20–H20   | 108.0       |
| C7–C6–H6A  | 108.6       | C17–C20–H20   | 108.0       |
| C5–C6–H6B  | 108.6       | C20–C21–H21A  | 109.5       |
| C7–C6–H6B  | 108.6       | C20–C21–H21B  | 109.5       |



Table S3. Cont.

|               |              |                 |             |
|---------------|--------------|-----------------|-------------|
| H6A—C6—H6B    | 107.6        | H21A—C21—H21B   | 109.5       |
| C8—C7—C6      | 113.61 (10)  | C20—C21—H21C    | 109.5       |
| C8—C7—H7A     | 108.8        | H21A—C21—H21C   | 109.5       |
| C6—C7—H7A     | 108.8        | H21B—C21—H21C   | 109.5       |
| C8—C7—H7B     | 108.8        | O6—C22—C23      | 110.54 (9)  |
| C6—C7—H7B     | 108.8        | O6—C22—C20      | 112.73 (9)  |
| H7A—C7—H7B    | 107.7        | C23—C22—C20     | 114.44 (10) |
| C9—C8—C7      | 113.37 (9)   | O6—C22—H22      | 106.2       |
| C9—C8—C14     | 114.47 (9)   | C23—C22—H22     | 106.2       |
| C7—C8—C14     | 112.83 (9)   | C20—C22—H22     | 106.2       |
| C9—C8—H8      | 105.0        | O7—C23—C24      | 103.92 (9)  |
| C7—C8—H8      | 105.0        | O7—C23—C22      | 109.39 (9)  |
| C14—C8—H8     | 105.0        | C24—C23—C22     | 114.25 (11) |
| O4—C9—C8      | 107.50 (9)   | O7—C23—H23      | 109.7       |
| O4—C9—C11     | 109.48 (10)  | C24—C23—H23     | 109.7       |
| C8—C9—C11     | 108.71 (9)   | C22—C23—H23     | 109.7       |
| O4—C9—C19     | 111.42 (9)   | C25—C24—C23     | 111.10 (11) |
| C8—C9—C19     | 113.07 (9)   | C25—C24—H24     | 124.5       |
| C11—C9—C19    | 106.60 (9)   | C23—C24—H24     | 124.5       |
| O2—C10—C19    | 109.50 (9)   | C24—C25—C26     | 106.24 (11) |
| O2—C10—C5     | 108.66 (9)   | C24—C25—C27     | 131.48 (13) |
| C19—C10—C5    | 118.97 (9)   | C26—C25—C27     | 122.27 (12) |
| O2—C10—C1     | 103.80 (8)   | O8—C26—O7       | 121.02 (12) |
| C19—C10—C1    | 110.80 (10)  | O8—C26—C25      | 129.10 (13) |
| C5—C10—C1     | 103.97 (9)   | O7—C26—C25      | 109.87 (10) |
| C12—C11—C9    | 111.61 (10)  | C25—C27—H27A    | 109.5       |
| C12—C11—H11A  | 109.3        | C25—C27—H27B    | 109.5       |
| C9—C11—H11A   | 109.3        | H27A—C27—H27B   | 109.5       |
| C12—C11—H11B  | 109.3        | C25—C27—H27C    | 109.5       |
| C9—C11—H11B   | 109.3        | H27A—C27—H27C   | 109.5       |
| H11A—C11—H11B | 108.0        | H27B—C27—H27C   | 109.5       |
| C13—C12—C11   | 122.33 (10)  | C4—C29—H29A     | 109.5       |
| C13—C12—H12   | 118.8        | C4—C29—H29B     | 109.5       |
| C11—C12—H12   | 118.8        | H29A—C29—H29B   | 109.5       |
| C12—C13—C14   | 123.17 (10)  | C4—C29—H29C     | 109.5       |
| C12—C13—C17   | 126.10 (10)  | H29A—C29—H29C   | 109.5       |
| C14—C13—C17   | 109.75 (9)   | H29B—C29—H29C   | 109.5       |
| C13—C14—C18   | 109.38 (9)   | C4—C30—H30A     | 109.5       |
| C13—C14—C15   | 100.05 (9)   | C4—C30—H30B     | 109.5       |
| C18—C14—C15   | 107.04 (10)  | H30A—C30—H30B   | 109.5       |
| C13—C14—C8    | 114.24 (9)   | C4—C30—H30C     | 109.5       |
| C18—C14—C8    | 106.86 (9)   | H30A—C30—H30C   | 109.5       |
| C15—C14—C8    | 118.84 (10)  | H30B—C30—H30C   | 109.5       |
| C4—O1—C1—C2   | 151.82 (10)  | C12—C13—C14—C8  | 4.53 (17)   |
| C4—O1—C1—C10  | 39.32 (11)   | C17—C13—C14—C8  | -164.78 (9) |
| O1—C1—C2—C3   | -94.37 (11)  | C9—C8—C14—C13   | 23.20 (14)  |
| C10—C1—C2—C3  | 18.16 (12)   | C7—C8—C14—C13   | 154.85 (10) |
| C10—O2—C3—O3  | 178.19 (11)  | C9—C8—C14—C18   | 144.31 (10) |
| C10—O2—C3—C2  | -1.70 (13)   | C7—C8—C14—C18   | -84.04 (12) |
| C1—C2—C3—O3   | 169.21 (12)  | C9—C8—C14—C15   | -94.59 (12) |
| C1—C2—C3—O2   | -10.91 (13)  | C7—C8—C14—C15   | 37.06 (13)  |
| C1—O1—C4—C30  | -164.02 (10) | C13—C14—C15—O5  | -77.42 (11) |
| C1—O1—C4—C29  | 76.16 (11)   | C18—C14—C15—O5  | 168.58 (10) |
| C1—O1—C4—C5   | -44.93 (12)  | C8—C14—C15—O5   | 47.58 (14)  |
| O1—C4—C5—C6   | 161.03 (10)  | C13—C14—C15—C16 | 41.04 (10)  |
| C30—C4—C5—C6  | -83.84 (13)  | C18—C14—C15—C16 | -72.96 (11) |
| C29—C4—C5—C6  | 43.21 (15)   | C8—C14—C15—C16  | 166.04 (9)  |

Table S3. Cont.

|                 |              |                 |              |
|-----------------|--------------|-----------------|--------------|
| O1–C4–C5–C10    | 32.01 (11)   | O5–C15–C16–C17  | 89.64 (12)   |
| C30–C4–C5–C10   | 147.14 (10)  | C14–C15–C16–C17 | –32.45 (12)  |
| C29–C4–C5–C10   | –85.81 (12)  | C12–C13–C17–C16 | –151.90 (13) |
| C10–C5–C6–C7    | –53.31 (15)  | C14–C13–C17–C16 | 17.02 (12)   |
| C4–C5–C6–C7     | –175.02 (10) | C12–C13–C17–C20 | 81.06 (15)   |
| C5–C6–C7–C8     | 90.62 (13)   | C14–C13–C17–C20 | –110.02 (11) |
| C6–C7–C8–C9     | –74.96 (12)  | C15–C16–C17–C13 | 10.00 (12)   |
| C6–C7–C8–C14    | 152.85 (9)   | C15–C16–C17–C20 | 138.36 (10)  |
| C7–C8–C9–O4     | –65.08 (12)  | O2–C10–C19–C9   | –56.78 (13)  |
| C14–C8–C9–O4    | 66.31 (12)   | C5–C10–C19–C9   | 68.95 (14)   |
| C7–C8–C9–C11    | 176.50 (10)  | C1–C10–C19–C9   | –170.68 (9)  |
| C14–C8–C9–C11   | –52.12 (13)  | O4–C9–C19–C10   | 48.78 (14)   |
| C7–C8–C9–C19    | 58.32 (13)   | C8–C9–C19–C10   | –72.44 (13)  |
| C14–C8–C9–C19   | –170.29 (9)  | C11–C9–C19–C10  | 168.16 (10)  |
| C3–O2–C10–C19   | –105.16 (10) | C13–C17–C20–C21 | –35.50 (13)  |
| C3–O2–C10–C5    | 123.40 (10)  | C16–C17–C20–C21 | –156.51 (10) |
| C3–O2–C10–C1    | 13.20 (11)   | C13–C17–C20–C22 | –159.19 (9)  |
| C6–C5–C10–O2    | 113.27 (11)  | C16–C17–C20–C22 | 79.80 (12)   |
| C4–C5–C10–O2    | –119.19 (9)  | C21–C20–C22–O6  | 170.75 (9)   |
| C6–C5–C10–C19   | –12.86 (15)  | C17–C20–C22–O6  | –64.62 (12)  |
| C4–C5–C10–C19   | 114.68 (11)  | C21–C20–C22–C23 | 43.29 (12)   |
| C6–C5–C10–C1    | –136.65 (11) | C17–C20–C22–C23 | 167.92 (9)   |
| C4–C5–C10–C1    | –9.11 (11)   | C26–O7–C23–C24  | –1.48 (13)   |
| O1–C1–C10–O2    | 96.47 (10)   | C26–O7–C23–C22  | 120.92 (11)  |
| C2–C1–C10–O2    | –19.11 (11)  | O6–C22–C23–O7   | –65.49 (12)  |
| O1–C1–C10–C19   | –146.09 (9)  | C20–C22–C23–O7  | 63.08 (13)   |
| C2–C1–C10–C19   | 98.33 (11)   | O6–C22–C23–C24  | 50.51 (12)   |
| O1–C1–C10–C5    | –17.15 (11)  | C20–C22–C23–C24 | 179.07 (10)  |
| C2–C1–C10–C5    | –132.73 (10) | O7–C23–C24–C25  | –0.03 (15)   |
| O4–C9–C11–C12   | –62.02 (13)  | C22–C23–C24–C25 | –119.16 (12) |
| C8–C9–C11–C12   | 55.15 (13)   | C23–C24–C25–C26 | 1.39 (16)    |
| C19–C9–C11–C12  | 177.35 (10)  | C23–C24–C25–C27 | –177.72 (15) |
| C9–C11–C12–C13  | –30.64 (18)  | C23–O7–C26–O8   | –177.88 (13) |
| C11–C12–C13–C14 | –0.4 (2)     | C23–O7–C26–C25  | 2.39 (14)    |
| C11–C12–C13–C17 | 167.14 (12)  | C24–C25–C26–O8  | 177.91 (15)  |
| C12–C13–C14–C18 | –115.18 (13) | C27–C25–C26–O8  | –2.9 (2)     |
| C17–C13–C14–C18 | 75.52 (12)   | C24–C25–C26–O7  | –2.38 (15)   |
| C12–C13–C14–C15 | 132.63 (12)  | C27–C25–C26–O7  | 176.82 (13)  |
| C17–C13–C14–C15 | –36.68 (11)  |                 |              |

**Table S4.** Anisotropic displacement parameters ( $\text{\AA}^2$ ) for micrandilactone H.

|     | $U^{11}$   | $U^{22}$   | $U^{33}$   | $U^{12}$    | $U^{13}$   | $U^{23}$    |
|-----|------------|------------|------------|-------------|------------|-------------|
| O1  | 0.0117 (3) | 0.0197 (5) | 0.0113 (3) | 0.0010 (3)  | 0.0061 (3) | 0.0015 (3)  |
| O2  | 0.0112 (3) | 0.0092 (4) | 0.0087 (3) | 0.0020 (3)  | 0.0032 (3) | 0.0007 (3)  |
| O3  | 0.0168 (4) | 0.0127 (4) | 0.0117 (4) | 0.0004 (3)  | 0.0011 (3) | 0.0004 (3)  |
| O4  | 0.0121 (3) | 0.0169 (4) | 0.0092 (3) | 0.0042 (3)  | 0.0031 (3) | 0.0013 (3)  |
| O5  | 0.0283 (5) | 0.0116 (4) | 0.0194 (4) | 0.0058 (4)  | 0.0138 (4) | 0.0036 (3)  |
| O6  | 0.0136 (4) | 0.0137 (4) | 0.0135 (4) | 0.0018 (3)  | 0.0059 (3) | 0.0007 (3)  |
| O7  | 0.0115 (3) | 0.0179 (5) | 0.0110 (3) | 0.0004 (3)  | 0.0038 (3) | 0.0032 (3)  |
| O8  | 0.0258 (5) | 0.0403 (7) | 0.0103 (4) | -0.0099 (5) | 0.0037 (4) | 0.0006 (4)  |
| C1  | 0.0129 (4) | 0.0124 (5) | 0.0117 (4) | 0.0027 (4)  | 0.0065 (4) | 0.0002 (4)  |
| C2  | 0.0155 (5) | 0.0133 (5) | 0.0106 (4) | 0.0012 (4)  | 0.0057 (4) | -0.0017 (4) |
| C3  | 0.0115 (4) | 0.0104 (5) | 0.0100 (4) | -0.0019 (4) | 0.0039 (4) | -0.0012 (4) |
| C4  | 0.0105 (4) | 0.0166 (6) | 0.0117 (4) | 0.0027 (4)  | 0.0049 (4) | 0.0030 (4)  |
| C5  | 0.0084 (4) | 0.0121 (5) | 0.0107 (4) | 0.0002 (4)  | 0.0039 (3) | 0.0006 (4)  |
| C6  | 0.0092 (4) | 0.0193 (6) | 0.0096 (4) | -0.0004 (4) | 0.0032 (3) | 0.0003 (4)  |
| C7  | 0.0122 (4) | 0.0133 (5) | 0.0121 (4) | -0.0037 (4) | 0.0058 (4) | -0.0037 (4) |
| C8  | 0.0095 (4) | 0.0094 (5) | 0.0092 (4) | -0.0002 (4) | 0.0042 (3) | -0.0005 (4) |
| C9  | 0.0113 (4) | 0.0088 (5) | 0.0094 (4) | -0.0008 (4) | 0.0047 (3) | -0.0011 (4) |
| C10 | 0.0096 (4) | 0.0087 (4) | 0.0093 (4) | 0.0021 (3)  | 0.0040 (3) | 0.0014 (3)  |
| C11 | 0.0206 (5) | 0.0140 (6) | 0.0159 (5) | -0.0074 (4) | 0.0119 (4) | -0.0060 (4) |
| C12 | 0.0146 (5) | 0.0151 (5) | 0.0137 (5) | -0.0063 (4) | 0.0083 (4) | -0.0040 (4) |
| C13 | 0.0108 (4) | 0.0104 (5) | 0.0101 (4) | -0.0007 (4) | 0.0051 (3) | -0.0001 (4) |
| C14 | 0.0101 (4) | 0.0096 (5) | 0.0082 (4) | -0.0002 (3) | 0.0037 (3) | 0.0000 (3)  |
| C15 | 0.0162 (5) | 0.0103 (5) | 0.0137 (5) | -0.0007 (4) | 0.0086 (4) | -0.0018 (4) |
| C16 | 0.0184 (5) | 0.0115 (5) | 0.0167 (5) | -0.0004 (4) | 0.0122 (4) | -0.0021 (4) |
| C17 | 0.0103 (4) | 0.0120 (5) | 0.0096 (4) | 0.0009 (4)  | 0.0048 (3) | 0.0005 (4)  |
| C18 | 0.0124 (4) | 0.0210 (6) | 0.0103 (4) | 0.0016 (4)  | 0.0042 (4) | 0.0018 (4)  |
| C19 | 0.0132 (4) | 0.0082 (5) | 0.0114 (4) | 0.0001 (4)  | 0.0067 (4) | -0.0007 (4) |
| C20 | 0.0091 (4) | 0.0124 (5) | 0.0090 (4) | 0.0015 (4)  | 0.0038 (3) | 0.0013 (4)  |
| C21 | 0.0176 (5) | 0.0127 (5) | 0.0149 (5) | 0.0022 (4)  | 0.0087 (4) | 0.0027 (4)  |
| C22 | 0.0092 (4) | 0.0142 (5) | 0.0095 (4) | 0.0002 (4)  | 0.0039 (3) | 0.0002 (4)  |
| C23 | 0.0098 (4) | 0.0157 (5) | 0.0091 (4) | -0.0013 (4) | 0.0033 (3) | -0.0010 (4) |
| C24 | 0.0109 (4) | 0.0202 (6) | 0.0150 (5) | 0.0000 (4)  | 0.0071 (4) | 0.0016 (4)  |
| C25 | 0.0178 (5) | 0.0175 (6) | 0.0161 (5) | -0.0017 (4) | 0.0113 (4) | -0.0001 (4) |
| C26 | 0.0185 (5) | 0.0181 (6) | 0.0115 (4) | -0.0064 (4) | 0.0068 (4) | -0.0006 (4) |
| C27 | 0.0359 (8) | 0.0304 (8) | 0.0267 (7) | 0.0028 (6)  | 0.0247 (6) | 0.0001 (6)  |
| C29 | 0.0144 (5) | 0.0182 (6) | 0.0193 (5) | 0.0058 (4)  | 0.0082 (4) | 0.0045 (5)  |
| C30 | 0.0115 (5) | 0.0223 (6) | 0.0172 (5) | 0.0009 (4)  | 0.0063 (4) | 0.0054 (5)  |

**Table S5.** Hepatoprotective effect of micrandilactone H (10  $\mu\text{M}$ ) against APAP-induced toxicity in HepG2 cell.

| Compounds         | OD (mean $\pm$ SD)    | Cell Survival Rate (% of Normal) |
|-------------------|-----------------------|----------------------------------|
| Control           | 1.286 $\pm$ 0.147     | 100.00                           |
| APAP 8 mM         | 0.494 $\pm$ 0.111 *** | 38.40                            |
| Micrandilactone H | 0.725 $\pm$ 0.042 ##  | 56.84                            |
| Bicylol           | 0.678 $\pm$ 0.020 ##  | 53.16                            |

\*\*\*  $p < 0.001$ , compared with control; ##  $p < 0.01$ , compared with model (APAP)
